# Supplementary material
Source: Springer Nature journal article supplement (https://www.springermedizin.de/resource/supplementary/40164_2013_65_MOESM5_ESM.pdf/9687108)

## Ingram *et al.*, Additional File 5:

ABCA1 is highly expressed in WNT driven medulloblastoma, relative to other subgroups and normal cerebellum

### ABCA1

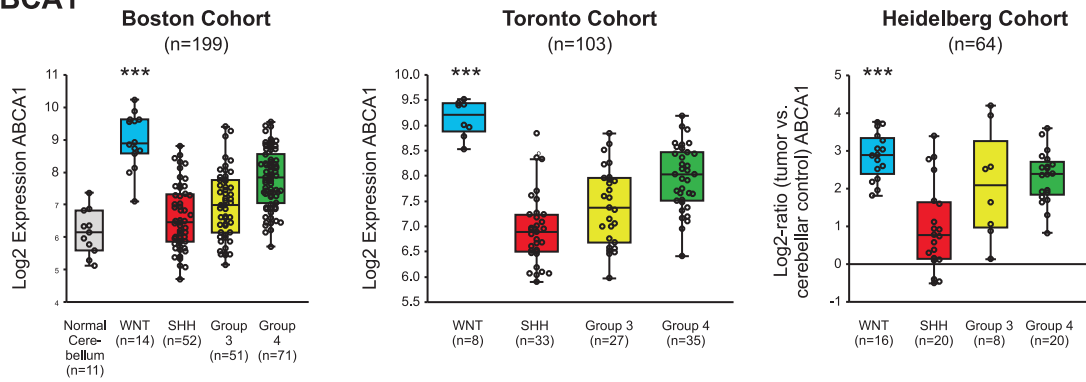

Supplement: MOESM5 [file 9687108]
